# Supplementary material for: Biologics Initiation in Rheumatoid Arthritis by Race and Ethnicity: Results From a Randomized Survey Study
Source: PubMed Central journal article supplement — ACR Open Rheumatol. 2023 Jun 13;5(7):371–5. doi: 10.1002/acr2.11573 (PMC10349254; doi:10.1002/acr2.11573), 2023-06-13
Supplement: ACR2-5-371-s001.pdf [file ACR2-5-371-s001.pdf]

*ACR Open*  
**Disclosure of Interest Form**  
**for individual author (not corresponding author)**

**NOTE:** The editorial office must receive signed Disclosure of Interest/ forms from all authors. These should be collected by the corresponding author and sent by the corresponding author to the editorial office in one package. Each author's individual Disclosure of Interest form must contain the author's signature on each page.

**Manuscript number:**\_ ACROR-23-035.R1

**Manuscript title:**\_ Biologics initiation in rheumatoid arthritis by race and ethnicity

**Name of first author/name of corresponding author:**\_Julia Simard

**Printed name, academic degree, and signature of author filling out this copy of form**

\_Audra Horomanski, MD. \_\_\_\_\_

**1. Individual Author's Financial Disclosure**

We regard a relationship that requires disclosure as a relationship (on the part of the author, any member of the author's immediate family, or any individual with whom the author has a significant relationship) with any entity that may potentially benefit from, or be harmed by, the publication of the results of the research or study. Disclosure is also necessary if the author (or any member of the author's immediate family, or any individual with whom the author has a significant relationship) would personally benefit financially from the publication of the results of the research or study. **For purposes of this form, we wish to know about relationships currently, or in the past 2 years, that are relevant to the manuscript being submitted.**

| Category of relationship requiring disclosure                                                                                                                                                                                | Please indicate disclosures by filling in your name in the "Yes" box below. For each name listed, include the name of the company or companies and if the category includes more than one item (e.g. consultancies, speaking fees, or honoraria; patents or licenses; received or pending), indicate which applies. If necessary, provide further details on an attached sheet. |           |           |
|------------------------------------------------------------------------------------------------------------------------------------------------------------------------------------------------------------------------------|---------------------------------------------------------------------------------------------------------------------------------------------------------------------------------------------------------------------------------------------------------------------------------------------------------------------------------------------------------------------------------|-----------|-----------|
|                                                                                                                                                                                                                              | No                                                                                                                                                                                                                                                                                                                                                                              | Yes       |           |
| Employment                                                                                                                                                                                                                   | X                                                                                                                                                                                                                                                                                                                                                                               |           |           |
| Consultancies, speaking fees, and honoraria: List all relevant consultancies, speaking fees, and/or honoraria and indicate whether they represent more than or less than \$10,000 per year per entity or a single occurrence | X                                                                                                                                                                                                                                                                                                                                                                               | <\$10,000 | >\$10,000 |
| Stock ownership or options                                                                                                                                                                                                   | X                                                                                                                                                                                                                                                                                                                                                                               |           |           |
| Expert testimony                                                                                                                                                                                                             | X                                                                                                                                                                                                                                                                                                                                                                               |           |           |
| Patents, licenses, or licensing fees received or pending (for what product, device, technique, substance, etc.)                                                                                                              | X                                                                                                                                                                                                                                                                                                                                                                               |           |           |
| Royalties (for what product, device, technique, substance, etc.)                                                                                                                                                             | X                                                                                                                                                                                                                                                                                                                                                                               |           |           |
| Paid consultation with investment analysts (specify)                                                                                                                                                                         | X                                                                                                                                                                                                                                                                                                                                                                               |           |           |
| Other (specify)                                                                                                                                                                                                              | X                                                                                                                                                                                                                                                                                                                                                                               |           |           |

*ACR Open*  
**Disclosure of Interest Form**  
**for individual author (not corresponding author)**

**NOTE:** The editorial office must receive signed Disclosure of Interest/ forms from all authors. These should be collected by the corresponding author and sent by the corresponding author to the editorial office in one package. Each author's individual Disclosure of Interest form must contain the author's signature on each page.

**Manuscript number:**\_ ACROR-23-035.R1

**Manuscript title:**\_ Biologics initiation in rheumatoid arthritis by race and ethnicity

**Name of first author/name of corresponding author:**\_Julia Simard

**Printed name, academic degree, and signature of author filling out this copy of form**

Julia F Simard, ScD, SM, 

---

**1. Individual Author's Financial Disclosure**

We regard a relationship that requires disclosure as a relationship (on the part of the author, any member of the author's immediate family, or any individual with whom the author has a significant relationship) with any entity that may potentially benefit from, or be harmed by, the publication of the results of the research or study. Disclosure is also necessary if the author (or any member of the author's immediate family, or any individual with whom the author has a significant relationship) would personally benefit financially from the publication of the results of the research or study. **For purposes of this form, we wish to know about relationships currently, or in the past 2 years, that are relevant to the manuscript being submitted.**

| Category of relationship requiring disclosure                                                                                                                                                                                | Please indicate disclosures by filling in your name in the "Yes" box below. For each name listed, include the name of the company or companies and if the category includes more than one item (e.g. consultancies, speaking fees, or honoraria; patents or licenses; received or pending), indicate which applies. If necessary, provide further details on an attached sheet. |           |           |
|------------------------------------------------------------------------------------------------------------------------------------------------------------------------------------------------------------------------------|---------------------------------------------------------------------------------------------------------------------------------------------------------------------------------------------------------------------------------------------------------------------------------------------------------------------------------------------------------------------------------|-----------|-----------|
|                                                                                                                                                                                                                              | No                                                                                                                                                                                                                                                                                                                                                                              | Yes       |           |
| Employment                                                                                                                                                                                                                   | X                                                                                                                                                                                                                                                                                                                                                                               |           |           |
| Consultancies, speaking fees, and honoraria: List all relevant consultancies, speaking fees, and/or honoraria and indicate whether they represent more than or less than \$10,000 per year per entity or a single occurrence | X                                                                                                                                                                                                                                                                                                                                                                               | <\$10,000 | >\$10,000 |
| Stock ownership or options                                                                                                                                                                                                   | X                                                                                                                                                                                                                                                                                                                                                                               |           |           |
| Expert testimony                                                                                                                                                                                                             | X                                                                                                                                                                                                                                                                                                                                                                               |           |           |
| Patents, licenses, or licensing fees received or pending (for what product, device, technique, substance, etc.)                                                                                                              | X                                                                                                                                                                                                                                                                                                                                                                               |           |           |
| Royalties (for what product, device, technique, substance, etc.)                                                                                                                                                             | X                                                                                                                                                                                                                                                                                                                                                                               |           |           |
| Paid consultation with investment analysts (specify)                                                                                                                                                                         | X                                                                                                                                                                                                                                                                                                                                                                               |           |           |

|                 |   |  |
|-----------------|---|--|
| Other (specify) | X |  |
|-----------------|---|--|

**2. Please list commercial entities that provided support for this study. (Do not include support from governmental or nonprofit entities here; all support from commercial, governmental, or nonprofit entities must be listed on the manuscript.)**

none

**3. Study Activities**

All authors are required to provide a description of their individual contribution, and the journal may publish that information. **Individuals must meet criteria 1 (1a, 1b, and/or 1c), 2, and 3 below to qualify for authorship.** Please indicate (by filling in your name) the aspects of the work for which you had responsibility.

| Authorship criteria                                                                  | Name(s)      |
|--------------------------------------------------------------------------------------|--------------|
| 1a. Substantial contributions to study conception and design                         | Julia Simard |
| 1b. Substantial contributions to acquisition of data                                 | Julia Simard |
| 1c. Substantial contributions to analysis and interpretation of data                 | Julia Simard |
| 2. Drafting the article or revising it critically for important intellectual content | Julia Simard |
| 3. Final approval of the version of the article to be published                      | Julia Simard |
| Other critical study activities (specify):                                           |              |

**4. Signature**

I certify that I have read the manuscript and revisions and agree to be a co-author.

I certify that I have participated sufficiently in the work to take public responsibility for this work and to qualify as an author as defined in Section 3 above.

I grant permission for any information I have disclosed on this form pertaining to my financial relationships, grant support, and participation in the study, or an appropriate summary, to be published with the manuscript in *ACR Open* if the manuscript is accepted for publication.

I warrant that the material is original, is not under consideration by another journal or other publication, has not been previously published elsewhere (in part, in full, in other words, or in the same words), and will not be submitted elsewhere unless rejected by *ACR Open*.

Name and academic degree (type or print) Julia F Simard, ScD, SM

Signature Julia Simard

AC&R manuscript number: **\_ ACROR-23-035.R1**

**Return this document to:** *your corresponding author*

*ACR Open*  
**Disclosure of Interest Form**  
**for individual author (not corresponding author)**

**NOTE:** The editorial office must receive signed Disclosure of Interest/ forms from all authors. These should be collected by the corresponding author and sent by the corresponding author to the editorial office in one package. Each author's individual Disclosure of Interest form must contain the author's signature on each page.

**Manuscript number:**\_ ACROR-23-035.R1

**Manuscript title:**\_ Biologics initiation in rheumatoid arthritis by race and ethnicity

**Name of first author/name of corresponding author:**\_Julia Simard

**Printed name, academic degree, and signature of author filling out this copy of form**

---

**1. Individual Author's Financial Disclosure**

We regard a relationship that requires disclosure as a relationship (on the part of the author, any member of the author's immediate family, or any individual with whom the author has a significant relationship) with any entity that may potentially benefit from, or be harmed by, the publication of the results of the research or study. Disclosure is also necessary if the author (or any member of the author's immediate family, or any individual with whom the author has a significant relationship) would personally benefit financially from the publication of the results of the research or study. **For purposes of this form, we wish to know about relationships currently, or in the past 2 years, that are relevant to the manuscript being submitted.**

| Category of relationship requiring disclosure                                                                                                                                                                                | Please indicate disclosures by filling in your name in the "Yes" box below. For each name listed, include the name of the company or companies and if the category includes more than one item (e.g. consultancies, speaking fees, or honoraria; patents or licenses; received or pending), indicate which applies. If necessary, provide further details on an attached sheet. |           |           |
|------------------------------------------------------------------------------------------------------------------------------------------------------------------------------------------------------------------------------|---------------------------------------------------------------------------------------------------------------------------------------------------------------------------------------------------------------------------------------------------------------------------------------------------------------------------------------------------------------------------------|-----------|-----------|
|                                                                                                                                                                                                                              | No                                                                                                                                                                                                                                                                                                                                                                              | Yes       |           |
| Employment                                                                                                                                                                                                                   | Rong Lu                                                                                                                                                                                                                                                                                                                                                                         |           |           |
| Consultancies, speaking fees, and honoraria: List all relevant consultancies, speaking fees, and/or honoraria and indicate whether they represent more than or less than \$10,000 per year per entity or a single occurrence | Rong Lu                                                                                                                                                                                                                                                                                                                                                                         | <\$10,000 | >\$10,000 |
| Stock ownership or options                                                                                                                                                                                                   | Rong Lu                                                                                                                                                                                                                                                                                                                                                                         |           |           |
| Expert testimony                                                                                                                                                                                                             | Rong Lu                                                                                                                                                                                                                                                                                                                                                                         |           |           |
| Patents, licenses, or licensing fees received or pending (for what product, device, technique, substance, etc.)                                                                                                              | Rong Lu                                                                                                                                                                                                                                                                                                                                                                         |           |           |
| Royalties (for what product, device, technique, substance, etc.)                                                                                                                                                             | Rong Lu                                                                                                                                                                                                                                                                                                                                                                         |           |           |
| Paid consultation with investment analysts (specify)                                                                                                                                                                         | Rong Lu                                                                                                                                                                                                                                                                                                                                                                         |           |           |
| Other (specify)                                                                                                                                                                                                              | Rong Lu                                                                                                                                                                                                                                                                                                                                                                         |           |           |

**2. Please list commercial entities that provided support for this study. (Do not include support from governmental or nonprofit entities here; all support from commercial, governmental, or nonprofit entities must be listed on the manuscript.)**

None.

**3. Study Activities**

All authors are required to provide a description of their individual contribution, and the journal may publish that information. **Individuals must meet criteria 1 (1a, 1b, and/or 1c), 2, and 3 below to qualify for authorship.** Please indicate (by filling in your name) the aspects of the work for which you had responsibility.

| <b>Authorship criteria</b>                                                                  | <b>Name(s)</b> |
|---------------------------------------------------------------------------------------------|----------------|
| <b>1a.</b> Substantial contributions to study conception and design                         |                |
| <b>1b.</b> Substantial contributions to acquisition of data                                 |                |
| <b>1c.</b> Substantial contributions to analysis and interpretation of data                 | Rong Lu        |
| <b>2.</b> Drafting the article or revising it critically for important intellectual content | Rong Lu        |
| <b>3.</b> Final approval of the version of the article to be published                      | Rong Lu        |
| Other critical study activities (specify):                                                  |                |

**4. Signature**

I certify that I have read the manuscript and revisions and agree to be a co-author.

I certify that I have participated sufficiently in the work to take public responsibility for this work and to qualify as an author as defined in Section 3 above.

I grant permission for any information I have disclosed on this form pertaining to my financial relationships, grant support, and participation in the study, or an appropriate summary, to be published with the manuscript in *ACR Open* if the manuscript is accepted for publication.

I warrant that the material is original, is not under consideration by another journal or other publication, has not been previously published elsewhere (in part, in full, in other words, or in the same words), and will not be submitted elsewhere unless rejected by *ACR Open*.

Name and academic degree (type or print) \_\_\_\_\_ Rong Lu \_\_\_\_\_

Signature     Rong Lu    

**AC&R manuscript number:** \_\_\_\_\_ ACROR-23-035.R1 \_\_\_\_\_

**Return this document to:**     *your corresponding author*

**2. Please list commercial entities that provided support for this study. (Do not include support from governmental or nonprofit entities here; all support from commercial, governmental, or nonprofit entities must be listed on the manuscript.)**

**3. Study Activities**

All authors are required to provide a description of their individual contribution, and the journal may publish that information. **Individuals must meet criteria 1 (1a, 1b, and/or 1c), 2, and 3 below to qualify for authorship.** Please indicate (by filling in your name) the aspects of the work for which you had responsibility.

| Authorship criteria                                                                  | Name(s)          |
|--------------------------------------------------------------------------------------|------------------|
| 1a. Substantial contributions to study conception and design                         | Audra Horomanski |
| 1b. Substantial contributions to acquisition of data                                 |                  |
| 1c. Substantial contributions to analysis and interpretation of data                 | Audra Horomanski |
| 2. Drafting the article or revising it critically for important intellectual content | Audra Horomanski |
| 3. Final approval of the version of the article to be published                      | Audra Horomanski |
| Other critical study activities (specify):                                           |                  |

**4. Signature**

I certify that I have read the manuscript and revisions and agree to be a co-author.

I certify that I have participated sufficiently in the work to take public responsibility for this work and to qualify as an author as defined in Section 3 above.

I grant permission for any information I have disclosed on this form pertaining to my financial relationships, grant support, and participation in the study, or an appropriate summary, to be published with the manuscript in *ACR Open* if the manuscript is accepted for publication.

I warrant that the material is original, is not under consideration by another journal or other publication, has not been previously published elsewhere (in part, in full, in other words, or in the same words), and will not be submitted elsewhere unless rejected by *ACR Open*.

Name and academic degree (type or print) \_\_\_\_\_ Audra Horomanski, MD \_\_\_\_\_

Signature \_\_\_\_\_  \_\_\_\_\_

**AC&R manuscript number:** \_\_\_\_\_ **ACROR-23-035.R1** \_\_\_\_\_

**Return this document to:**     *your corresponding author*

*ACR Open*  
**Disclosure of Interest Form**  
**for individual author (not corresponding author)**

**NOTE:** The editorial office must receive signed Disclosure of Interest/ forms from all authors. These should be collected by the corresponding author and sent by the corresponding author to the editorial office in one package. Each author's individual Disclosure of Interest form must contain the author's signature on each page.

**Manuscript number:**\_ ACROR-23-035.R1

**Manuscript title:**\_ Biologics initiation in rheumatoid arthritis by race and ethnicity

**Name of first author/name of corresponding author:**\_Julia Simard

**Printed name, academic degree, and signature of author filling out this copy of form**

\_\_\_\_Mariani Deluna BA Mariani Deluna\_\_\_\_\_

**1. Individual Author's Financial Disclosure**

We regard a relationship that requires disclosure as a relationship (on the part of the author, any member of the author's immediate family, or any individual with whom the author has a significant relationship) with any entity that may potentially benefit from, or be harmed by, the publication of the results of the research or study. Disclosure is also necessary if the author (or any member of the author's immediate family, or any individual with whom the author has a significant relationship) would personally benefit financially from the publication of the results of the research or study. **For purposes of this form, we wish to know about relationships currently, or in the past 2 years, that are relevant to the manuscript being submitted.**

| Category of relationship requiring disclosure                                                                                                                                                                                | Please indicate disclosures by filling in your name in the "Yes" box below. For each name listed, include the name of the company or companies and if the category includes more than one item (e.g. consultancies, speaking fees, or honoraria; patents or licenses; received or pending), indicate which applies. If necessary, provide further details on an attached sheet. |                                                                                                                                                                                                                    |           |           |
|------------------------------------------------------------------------------------------------------------------------------------------------------------------------------------------------------------------------------|---------------------------------------------------------------------------------------------------------------------------------------------------------------------------------------------------------------------------------------------------------------------------------------------------------------------------------------------------------------------------------|--------------------------------------------------------------------------------------------------------------------------------------------------------------------------------------------------------------------|-----------|-----------|
|                                                                                                                                                                                                                              | No                                                                                                                                                                                                                                                                                                                                                                              | Yes                                                                                                                                                                                                                |           |           |
| Employment                                                                                                                                                                                                                   |                                                                                                                                                                                                                                                                                                                                                                                 | Mariani Deluna                                                                                                                                                                                                     |           |           |
| Consultancies, speaking fees, and honoraria: List all relevant consultancies, speaking fees, and/or honoraria and indicate whether they represent more than or less than \$10,000 per year per entity or a single occurrence |                                                                                                                                                                                                                                                                                                                                                                                 | <table border="1" style="width: 100%; border-collapse: collapse;"> <tr> <td style="width: 50%; text-align: center;">&lt;\$10,000</td> <td style="width: 50%; text-align: center;">&gt;\$10,000</td> </tr> </table> | <\$10,000 | >\$10,000 |
| <\$10,000                                                                                                                                                                                                                    | >\$10,000                                                                                                                                                                                                                                                                                                                                                                       |                                                                                                                                                                                                                    |           |           |
| Stock ownership or options                                                                                                                                                                                                   |                                                                                                                                                                                                                                                                                                                                                                                 |                                                                                                                                                                                                                    |           |           |
| Expert testimony                                                                                                                                                                                                             |                                                                                                                                                                                                                                                                                                                                                                                 |                                                                                                                                                                                                                    |           |           |
| Patents, licenses, or licensing fees received or pending (for what product, device, technique, substance, etc.)                                                                                                              |                                                                                                                                                                                                                                                                                                                                                                                 |                                                                                                                                                                                                                    |           |           |
| Royalties (for what product, device, technique, substance, etc.)                                                                                                                                                             |                                                                                                                                                                                                                                                                                                                                                                                 |                                                                                                                                                                                                                    |           |           |
| Paid consultation with investment analysts (specify)                                                                                                                                                                         |                                                                                                                                                                                                                                                                                                                                                                                 |                                                                                                                                                                                                                    |           |           |
| Other (specify)                                                                                                                                                                                                              |                                                                                                                                                                                                                                                                                                                                                                                 |                                                                                                                                                                                                                    |           |           |

**2. Please list commercial entities that provided support for this study. (Do not include support from governmental or nonprofit entities here; all support from commercial, governmental, or nonprofit entities must be listed on the manuscript.)**

### **3. Study Activities**

All authors are required to provide a description of their individual contribution, and the journal may publish that information. **Individuals must meet criteria 1 (1a, 1b, and/or 1c), 2, and 3 below to qualify for authorship.** Please indicate (by filling in your name) the aspects of the work for which you had responsibility.

| <b>Authorship criteria</b>                                                                  | <b>Name(s)</b> |
|---------------------------------------------------------------------------------------------|----------------|
| <b>1a.</b> Substantial contributions to study conception and design                         | Mariani Deluna |
| <b>1b.</b> Substantial contributions to acquisition of data                                 |                |
| <b>1c.</b> Substantial contributions to analysis and interpretation of data                 | Mariani Deluna |
| <b>2.</b> Drafting the article or revising it critically for important intellectual content | Mariani Deluna |
| <b>3.</b> Final approval of the version of the article to be published                      | Mariani Deluna |
| Other critical study activities (specify):                                                  |                |

### **4. Signature**

I certify that I have read the manuscript and revisions and agree to be a co-author.

I certify that I have participated sufficiently in the work to take public responsibility for this work and to qualify as an author as defined in Section 3 above.

I grant permission for any information I have disclosed on this form pertaining to my financial relationships, grant support, and participation in the study, or an appropriate summary, to be published with the manuscript in *ACR Open* if the manuscript is accepted for publication.

I warrant that the material is original, is not under consideration by another journal or other publication, has not been previously published elsewhere (in part, in full, in other words, or in the same words), and will not be submitted elsewhere unless rejected by *ACR Open*.

Name and academic degree (type or print) Mariani Deluna BA

Signature *Mariani Deluna*

**AC&R manuscript number:** ACRO-23-035.R1       

**Return this document to:** *your corresponding author*



*ACR Open*  
**Disclosure of Interest Form**  
**for individual author (not corresponding author)**

**NOTE:** The editorial office must receive signed Disclosure of Interest/ forms from all authors. These should be collected by the corresponding author and sent by the corresponding author to the editorial office in one package. Each author's individual Disclosure of Interest form must contain the author's signature on each page.

**Manuscript number:**\_ ACROR-23-035.R1

**Manuscript title:**\_ Biologics initiation in rheumatoid arthritis by race and ethnicity

**Name of first author/name of corresponding author:**\_ Julia Simard

**Printed name, academic degree, and signature of author filling out this copy of form**

**Saadiya Hawa MD, MS Epidemiology**

**1. Individual Author's Financial Disclosure**

We regard a relationship that requires disclosure as a relationship (on the part of the author, any member of the author's immediate family, or any individual with whom the author has a significant relationship) with any entity that may potentially benefit from, or be harmed by, the publication of the results of the research or study. Disclosure is also necessary if the author (or any member of the author's immediate family, or any individual with whom the author has a significant relationship) would personally benefit financially from the publication of the results of the research or study. **For purposes of this form, we wish to know about relationships currently, or in the past 2 years, that are relevant to the manuscript being submitted.**

| Category of relationship requiring disclosure                                                                                                                                                                                | Please indicate disclosures by filling in your name in the "Yes" box below. For each name listed, include the name of the company or companies and if the category includes more than one item (e.g. consultancies, speaking fees, or honoraria; patents or licenses; received or pending), indicate which applies. If necessary, provide further details on an attached sheet. |                                                                                                                                                                                   |                     |                     |
|------------------------------------------------------------------------------------------------------------------------------------------------------------------------------------------------------------------------------|---------------------------------------------------------------------------------------------------------------------------------------------------------------------------------------------------------------------------------------------------------------------------------------------------------------------------------------------------------------------------------|-----------------------------------------------------------------------------------------------------------------------------------------------------------------------------------|---------------------|---------------------|
|                                                                                                                                                                                                                              | No                                                                                                                                                                                                                                                                                                                                                                              | Yes                                                                                                                                                                               |                     |                     |
| Employment                                                                                                                                                                                                                   |                                                                                                                                                                                                                                                                                                                                                                                 |                                                                                                                                                                                   |                     |                     |
| Consultancies, speaking fees, and honoraria: List all relevant consultancies, speaking fees, and/or honoraria and indicate whether they represent more than or less than \$10,000 per year per entity or a single occurrence |                                                                                                                                                                                                                                                                                                                                                                                 | <table border="1" style="width: 100%; text-align: center;"> <tr> <td style="width: 50%;"><b>&lt;\$10,000</b></td> <td style="width: 50%;"><b>&gt;\$10,000</b></td> </tr> </table> | <b>&lt;\$10,000</b> | <b>&gt;\$10,000</b> |
| <b>&lt;\$10,000</b>                                                                                                                                                                                                          | <b>&gt;\$10,000</b>                                                                                                                                                                                                                                                                                                                                                             |                                                                                                                                                                                   |                     |                     |
| Stock ownership or options                                                                                                                                                                                                   |                                                                                                                                                                                                                                                                                                                                                                                 |                                                                                                                                                                                   |                     |                     |
| Expert testimony                                                                                                                                                                                                             |                                                                                                                                                                                                                                                                                                                                                                                 |                                                                                                                                                                                   |                     |                     |
| Patents, licenses, or licensing fees received or pending (for what product, device, technique, substance, etc.)                                                                                                              |                                                                                                                                                                                                                                                                                                                                                                                 |                                                                                                                                                                                   |                     |                     |
| Royalties (for what product, device, technique, substance, etc.)                                                                                                                                                             |                                                                                                                                                                                                                                                                                                                                                                                 |                                                                                                                                                                                   |                     |                     |
| Paid consultation with investment analysts (specify)                                                                                                                                                                         |                                                                                                                                                                                                                                                                                                                                                                                 |                                                                                                                                                                                   |                     |                     |
| Other (specify)                                                                                                                                                                                                              |                                                                                                                                                                                                                                                                                                                                                                                 |                                                                                                                                                                                   |                     |                     |

**2. Please list commercial entities that provided support for this study. (Do not include support from governmental or nonprofit entities here; all support from commercial, governmental, or nonprofit entities must be listed on the manuscript.)**

**3. Study Activities**

All authors are required to provide a description of their individual contribution, and the journal may publish that information. **Individuals must meet criteria 1 (1a, 1b, and/or 1c), 2, and 3 below to qualify for authorship.** Please indicate (by filling in your name) the aspects of the work for which you had responsibility.

| Authorship criteria                                                                  | Name(s)      |
|--------------------------------------------------------------------------------------|--------------|
| 1a. Substantial contributions to study conception and design                         |              |
| 1b. Substantial contributions to acquisition of data                                 | Saadiya Hawa |
| 1c. Substantial contributions to analysis and interpretation of data                 | Saadiya Hawa |
| 2. Drafting the article or revising it critically for important intellectual content | Saadiya Hawa |
| 3. Final approval of the version of the article to be published                      | Saadiya Hawa |
| Other critical study activities (specify):                                           |              |

**4. Signature**

I certify that I have read the manuscript and revisions and agree to be a co-author.

I certify that I have participated sufficiently in the work to take public responsibility for this work and to qualify as an author as defined in Section 3 above.

I grant permission for any information I have disclosed on this form pertaining to my financial relationships, grant support, and participation in the study, or an appropriate summary, to be published with the manuscript in *ACR Open* if the manuscript is accepted for publication.

I warrant that the material is original, is not under consideration by another journal or other publication, has not been previously published elsewhere (in part, in full, in other words, or in the same words), and will not be submitted elsewhere unless rejected by *ACR Open*.

Name and academic degree (type or print) Saadiya Hawa, MD, MS

Signature  \_\_\_\_\_

**AC&R manuscript number:** ACROR-23-035.R1

**Return this document to:** *your corresponding author*

***ACR Open***  
**Disclosure of Interest Form**  
**for individual author (not corresponding author)**

**NOTE:** The editorial office must receive signed Disclosure of Interest/ forms from all authors. These should be collected by the corresponding author and sent by the corresponding author to the editorial office in one package. Each author's individual Disclosure of Interest form must contain the author's signature on each page.

**Manuscript number:**\_ ACROR-23-035.R1

**Manuscript title:**\_ Biologics initiation in rheumatoid arthritis by race and ethnicity

**Name of first author/name of corresponding author:**\_Julia Simard

**Printed name, academic degree, and signature of author filling out this copy of form:**

**Matthew Baker, MD MS**

**1. Individual Author's Financial Disclosure**

We regard a relationship that requires disclosure as a relationship (on the part of the author, any member of the author's immediate family, or any individual with whom the author has a significant relationship) with any entity that may potentially benefit from, or be harmed by, the publication of the results of the research or study. Disclosure is also necessary if the author (or any member of the author's immediate family, or any individual with whom the author has a significant relationship) would personally benefit financially from the publication of the results of the research or study. **For purposes of this form, we wish to know about relationships currently, or in the past 2 years, that are relevant to the manuscript being submitted.**

| Category of relationship requiring disclosure                                                                                                                                                                                | Please indicate disclosures by filling in your name in the "Yes" box below. For each name listed, include the name of the company or companies and if the category includes more than one item (e.g. consultancies, speaking fees, or honoraria; patents or licenses; received or pending), indicate which applies. If necessary, provide further details on an attached sheet. |                                                                                                                                                                 |           |           |
|------------------------------------------------------------------------------------------------------------------------------------------------------------------------------------------------------------------------------|---------------------------------------------------------------------------------------------------------------------------------------------------------------------------------------------------------------------------------------------------------------------------------------------------------------------------------------------------------------------------------|-----------------------------------------------------------------------------------------------------------------------------------------------------------------|-----------|-----------|
|                                                                                                                                                                                                                              | No                                                                                                                                                                                                                                                                                                                                                                              | Yes                                                                                                                                                             |           |           |
| Employment                                                                                                                                                                                                                   | X                                                                                                                                                                                                                                                                                                                                                                               |                                                                                                                                                                 |           |           |
| Consultancies, speaking fees, and honoraria: List all relevant consultancies, speaking fees, and/or honoraria and indicate whether they represent more than or less than \$10,000 per year per entity or a single occurrence | X                                                                                                                                                                                                                                                                                                                                                                               | <table border="1" style="width: 100%;"> <tr> <td style="text-align: center;">&lt;\$10,000</td> <td style="text-align: center;">&gt;\$10,000</td> </tr> </table> | <\$10,000 | >\$10,000 |
| <\$10,000                                                                                                                                                                                                                    | >\$10,000                                                                                                                                                                                                                                                                                                                                                                       |                                                                                                                                                                 |           |           |
| Stock ownership or options                                                                                                                                                                                                   | X                                                                                                                                                                                                                                                                                                                                                                               |                                                                                                                                                                 |           |           |
| Expert testimony                                                                                                                                                                                                             | X                                                                                                                                                                                                                                                                                                                                                                               |                                                                                                                                                                 |           |           |
| Patents, licenses, or licensing fees received or pending (for what product, device, technique, substance, etc.)                                                                                                              | X                                                                                                                                                                                                                                                                                                                                                                               |                                                                                                                                                                 |           |           |
| Royalties (for what product, device, technique, substance, etc.)                                                                                                                                                             | X                                                                                                                                                                                                                                                                                                                                                                               |                                                                                                                                                                 |           |           |
| Paid consultation with investment analysts (specify)                                                                                                                                                                         | X                                                                                                                                                                                                                                                                                                                                                                               |                                                                                                                                                                 |           |           |

|                 |   |  |
|-----------------|---|--|
| Other (specify) | X |  |
|-----------------|---|--|

**2. Please list commercial entities that provided support for this study. (Do not include support from governmental or nonprofit entities here; all support from commercial, governmental, or nonprofit entities must be listed on the manuscript.)**

**3. Study Activities**

All authors are required to provide a description of their individual contribution, and the journal may publish that information. **Individuals must meet criteria 1 (1a, 1b, and/or 1c), 2, and 3 below to qualify for authorship.** Please indicate (by filling in your name) the aspects of the work for which you had responsibility.

| Authorship criteria                                                                  | Name(s)       |
|--------------------------------------------------------------------------------------|---------------|
| 1a. Substantial contributions to study conception and design                         | Matthew Baker |
| 1b. Substantial contributions to acquisition of data                                 |               |
| 1c. Substantial contributions to analysis and interpretation of data                 | Matthew Baker |
| 2. Drafting the article or revising it critically for important intellectual content | Matthew Baker |
| 3. Final approval of the version of the article to be published                      | Matthew Baker |
| Other critical study activities (specify):                                           |               |

**4. Signature**

I certify that I have read the manuscript and revisions and agree to be a co-author.

I certify that I have participated sufficiently in the work to take public responsibility for this work and to qualify as an author as defined in Section 3 above.

I grant permission for any information I have disclosed on this form pertaining to my financial relationships, grant support, and participation in the study, or an appropriate summary, to be published with the manuscript in *ACR Open* if the manuscript is accepted for publication.

I warrant that the material is original, is not under consideration by another journal or other publication, has not been previously published elsewhere (in part, in full, in other words, or in the same words), and will not be submitted elsewhere unless rejected by *ACR Open*.

Name and academic degree (type or print) Matthew Baker, MD MS

Signature 

AC&R manuscript number: ACROR-23-035.R1

Return this document to: *your corresponding author*

*ACR Open*  
**Disclosure of Interest Form**  
**for individual author (not corresponding author)**

**NOTE:** The editorial office must receive signed Disclosure of Interest/ forms from all authors. These should be collected by the corresponding author and sent by the corresponding author to the editorial office in one package. Each author's individual Disclosure of Interest form must contain the author's signature on each page.

**Manuscript number:**\_ ACROR-23-035.R1

**Manuscript title:**\_ Biologics initiation in rheumatoid arthritis by race and ethnicity

**Name of first author/name of corresponding author:**\_ Julia Simard

**Printed name, academic degree, and signature of author filling out this copy of form**

**Titilola Falasinnu, PhD**

*Titilola Falasinnu*

**1. Individual Author's Financial Disclosure**

We regard a relationship that requires disclosure as a relationship (on the part of the author, any member of the author's immediate family, or any individual with whom the author has a significant relationship) with any entity that may potentially benefit from, or be harmed by, the publication of the results of the research or study. Disclosure is also necessary if the author (or any member of the author's immediate family, or any individual with whom the author has a significant relationship) would personally benefit financially from the publication of the results of the research or study. **For purposes of this form, we wish to know about relationships currently, or in the past 2 years, that are relevant to the manuscript being submitted.**

| Category of relationship requiring disclosure                                                                                                                                                                                | Please indicate disclosures by filling in your name in the "Yes" box below. For each name listed, include the name of the company or companies and if the category includes more than one item (e.g. consultancies, speaking fees, or honoraria; patents or licenses; received or pending), indicate which applies. If necessary, provide further details on an attached sheet. |           |           |
|------------------------------------------------------------------------------------------------------------------------------------------------------------------------------------------------------------------------------|---------------------------------------------------------------------------------------------------------------------------------------------------------------------------------------------------------------------------------------------------------------------------------------------------------------------------------------------------------------------------------|-----------|-----------|
|                                                                                                                                                                                                                              | No                                                                                                                                                                                                                                                                                                                                                                              | Yes       |           |
| Employment                                                                                                                                                                                                                   | No                                                                                                                                                                                                                                                                                                                                                                              |           |           |
| Consultancies, speaking fees, and honoraria: List all relevant consultancies, speaking fees, and/or honoraria and indicate whether they represent more than or less than \$10,000 per year per entity or a single occurrence | No                                                                                                                                                                                                                                                                                                                                                                              | <\$10,000 | >\$10,000 |
| Stock ownership or options                                                                                                                                                                                                   | No                                                                                                                                                                                                                                                                                                                                                                              |           |           |
| Expert testimony                                                                                                                                                                                                             | No                                                                                                                                                                                                                                                                                                                                                                              |           |           |
| Patents, licenses, or licensing fees received or pending (for what product, device, technique, substance, etc.)                                                                                                              | No                                                                                                                                                                                                                                                                                                                                                                              |           |           |
| Royalties (for what product, device, technique, substance, etc.)                                                                                                                                                             | No                                                                                                                                                                                                                                                                                                                                                                              |           |           |
| Paid consultation with investment analysts (specify)                                                                                                                                                                         | No                                                                                                                                                                                                                                                                                                                                                                              |           |           |
| Other (specify)                                                                                                                                                                                                              | No                                                                                                                                                                                                                                                                                                                                                                              |           |           |

**2. Please list commercial entities that provided support for this study. (Do not include support from governmental or nonprofit entities here; all support from commercial, governmental, or nonprofit entities must be listed on the manuscript.)**

**3. Study Activities**

All authors are required to provide a description of their individual contribution, and the journal may publish that information. **Individuals must meet criteria 1 (1a, 1b, and/or 1c), 2, and 3 below to qualify for authorship.** Please indicate (by filling in your name) the aspects of the work for which you had responsibility.

| Authorship criteria                                                                  | Name(s)            |
|--------------------------------------------------------------------------------------|--------------------|
| 1a. Substantial contributions to study conception and design                         | Titilola Falasinnu |
| 1b. Substantial contributions to acquisition of data                                 |                    |
| 1c. Substantial contributions to analysis and interpretation of data                 | Titilola Falasinnu |
| 2. Drafting the article or revising it critically for important intellectual content | Titilola Falasinnu |
| 3. Final approval of the version of the article to be published                      | Titilola Falasinnu |
| Other critical study activities (specify):                                           |                    |

**4. Signature**

I certify that I have read the manuscript and revisions and agree to be a co-author.

I certify that I have participated sufficiently in the work to take public responsibility for this work and to qualify as an author as defined in Section 3 above.

I grant permission for any information I have disclosed on this form pertaining to my financial relationships, grant support, and participation in the study, or an appropriate summary, to be published with the manuscript in *ACR Open* if the manuscript is accepted for publication.

I warrant that the material is original, is not under consideration by another journal or other publication, has not been previously published elsewhere (in part, in full, in other words, or in the same words), and will not be submitted elsewhere unless rejected by *ACR Open*.

Name and academic degree (type or print) \_\_\_\_\_ Titilola Falasinnu \_\_\_\_\_

Signature Titilola Falasinnu

AC&R manuscript number: \_\_\_ **ACROR-23-035.R1**  
\_\_\_\_\_

**Return this document to:**     *your corresponding author*

***ACR Open***  
**Disclosure of Interest Form**  
**for individual author (not corresponding author)**

**NOTE:** The editorial office must receive signed Disclosure of Interest/ forms from all authors. These should be collected by the corresponding author and sent by the corresponding author to the editorial office in one package. Each author's individual Disclosure of Interest form must contain the author's signature on each page.

**Manuscript number:**\_ ACOR-23-035.R1

**Manuscript title:**\_ Biologics initiation in rheumatoid arthritis by race and ethnicity

**Name of first author/name of corresponding author:**\_ Julia Simard

**Printed name, academic degree, and signature of author filling out this copy of form**

---

**1. Individual Author's Financial Disclosure**

We regard a relationship that requires disclosure as a relationship (on the part of the author, any member of the author's immediate family, or any individual with whom the author has a significant relationship) with any entity that may potentially benefit from, or be harmed by, the publication of the results of the research or study. Disclosure is also necessary if the author (or any member of the author's immediate family, or any individual with whom the author has a significant relationship) would personally benefit financially from the publication of the results of the research or study. **For purposes of this form, we wish to know about relationships currently, or in the past 2 years, that are relevant to the manuscript being submitted.**

| Category of relationship requiring disclosure                                                                                                                                                                                | Please indicate disclosures by filling in your name in the "Yes" box below. For each name listed, include the name of the company or companies and if the category includes more than one item (e.g. consultancies, speaking fees, or honoraria; patents or licenses; received or pending), indicate which applies. If necessary, provide further details on an attached sheet. |                                                                                                                                                                                                                    |           |           |
|------------------------------------------------------------------------------------------------------------------------------------------------------------------------------------------------------------------------------|---------------------------------------------------------------------------------------------------------------------------------------------------------------------------------------------------------------------------------------------------------------------------------------------------------------------------------------------------------------------------------|--------------------------------------------------------------------------------------------------------------------------------------------------------------------------------------------------------------------|-----------|-----------|
|                                                                                                                                                                                                                              | No                                                                                                                                                                                                                                                                                                                                                                              | Yes                                                                                                                                                                                                                |           |           |
| Employment                                                                                                                                                                                                                   | X                                                                                                                                                                                                                                                                                                                                                                               |                                                                                                                                                                                                                    |           |           |
| Consultancies, speaking fees, and honoraria: List all relevant consultancies, speaking fees, and/or honoraria and indicate whether they represent more than or less than \$10,000 per year per entity or a single occurrence | X                                                                                                                                                                                                                                                                                                                                                                               | <table border="1" style="width: 100%; border-collapse: collapse;"> <tr> <td style="width: 50%; text-align: center;">&lt;\$10,000</td> <td style="width: 50%; text-align: center;">&gt;\$10,000</td> </tr> </table> | <\$10,000 | >\$10,000 |
| <\$10,000                                                                                                                                                                                                                    | >\$10,000                                                                                                                                                                                                                                                                                                                                                                       |                                                                                                                                                                                                                    |           |           |
| Stock ownership or options                                                                                                                                                                                                   | X                                                                                                                                                                                                                                                                                                                                                                               |                                                                                                                                                                                                                    |           |           |
| Expert testimony                                                                                                                                                                                                             | X                                                                                                                                                                                                                                                                                                                                                                               |                                                                                                                                                                                                                    |           |           |
| Patents, licenses, or licensing fees received or pending (for what product, device, technique, substance, etc.)                                                                                                              | X                                                                                                                                                                                                                                                                                                                                                                               |                                                                                                                                                                                                                    |           |           |
| Royalties (for what product, device, technique, substance, etc.)                                                                                                                                                             | X                                                                                                                                                                                                                                                                                                                                                                               |                                                                                                                                                                                                                    |           |           |
| Paid consultation with investment analysts (specify)                                                                                                                                                                         | X                                                                                                                                                                                                                                                                                                                                                                               |                                                                                                                                                                                                                    |           |           |
| Other (specify)                                                                                                                                                                                                              | X                                                                                                                                                                                                                                                                                                                                                                               |                                                                                                                                                                                                                    |           |           |

**2. Please list commercial entities that provided support for this study. (Do not include support from governmental or nonprofit entities here; all support from commercial, governmental, or nonprofit entities must be listed on the manuscript.)**

None

**3. Study Activities**

All authors are required to provide a description of their individual contribution, and the journal may publish that information. **Individuals must meet criteria 1 (1a, 1b, and/or 1c), 2, and 3 below to qualify for authorship.** Please indicate (by filling in your name) the aspects of the work for which you had responsibility.

| <b>Authorship criteria</b>                                                                  | <b>Name(s)</b>   |
|---------------------------------------------------------------------------------------------|------------------|
| <b>1a.</b> Substantial contributions to study conception and design                         | Robert Fairchild |
| <b>1b.</b> Substantial contributions to acquisition of data                                 | Robert Fairchild |
| <b>1c.</b> Substantial contributions to analysis and interpretation of data                 | Robert Fairchild |
| <b>2.</b> Drafting the article or revising it critically for important intellectual content | Robert Fairchild |
| <b>3.</b> Final approval of the version of the article to be published                      | Robert Fairchild |
| Other critical study activities (specify):                                                  |                  |

**4. Signature**

I certify that I have read the manuscript and revisions and agree to be a co-author.

I certify that I have participated sufficiently in the work to take public responsibility for this work and to qualify as an author as defined in Section 3 above.

I grant permission for any information I have disclosed on this form pertaining to my financial relationships, grant support, and participation in the study, or an appropriate summary, to be published with the manuscript in *ACR Open* if the manuscript is accepted for publication.

I warrant that the material is original, is not under consideration by another journal or other publication, has not been previously published elsewhere (in part, in full, in other words, or in the same words), and will not be submitted elsewhere unless rejected by *ACR Open*.

Name and academic degree (type or print) \_\_\_ Robert Fairchild, MD  
PhD \_\_\_\_\_

Signature \_\_\_\_\_ 

**AC&R manuscript number:** ACROR-23-035.R1

**Return this document to:** *your corresponding author*
